# Supplementary material for: Cationic polythiophene for specific detection of cyanide ions in water using fluorometric technique
Source: Royal Society of Chemistry journal article supplement (doi:10.1039/c5ra17448a), 2015-01-01
Supplement: c5ra17448a1.pdf [file c5ra17448a1.pdf]

## Supporting Information

### **Cationic Polythiophene for Specific Detection of Cyanide Ions in Water Using Fluorometric Technique**

Radhakanta Ghosh<sup>a</sup>, Sandip Das<sup>a</sup>, Dhruba P. Chatterjee<sup>b</sup> and Arun K. Nandi<sup>a\*</sup>

Polymer Science Unit, Indian Association for the cultivation of Science, Jadavpur, Kolkata-  
700 032, INDIA

---

\*<sup>a</sup>For correspondence: Arun K. Nandi, Email: [psuakn@iacs.res.in](mailto:psuakn@iacs.res.in)

<sup>b</sup>Dept. of Chemistry, Presidency University, Kolkata-700 073

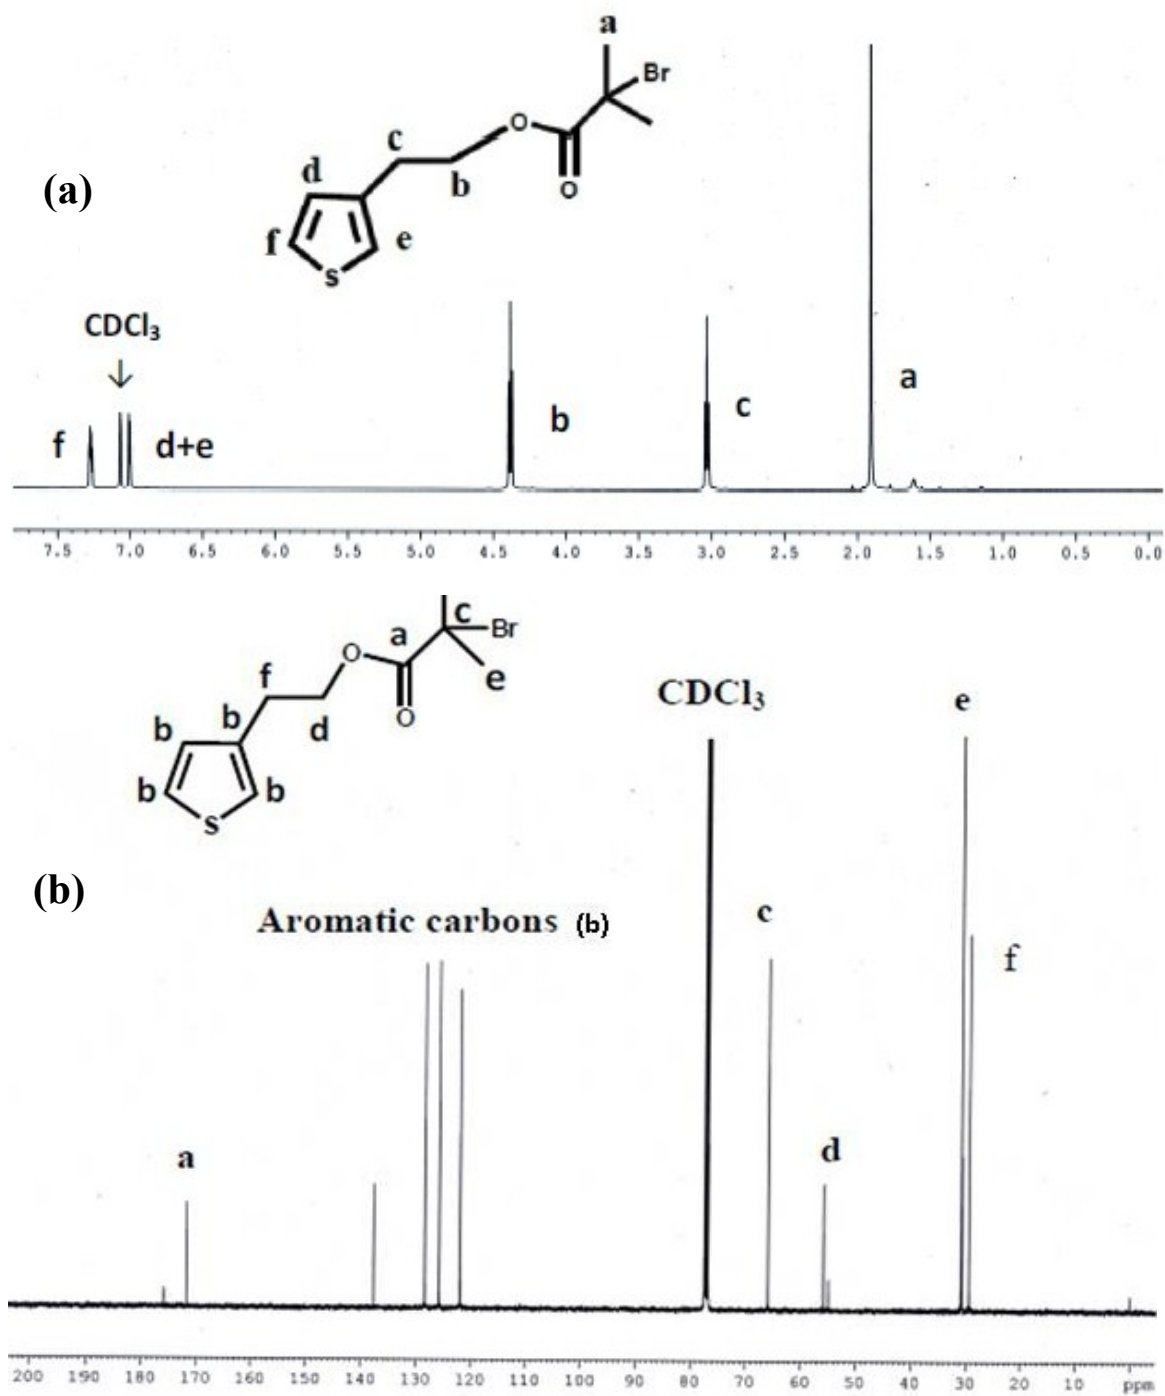

Fig. S1 (a)  $^1\text{H}$  NMR spectrum and (b)  $^{13}\text{C}$  NMR of TI in  $\text{CDCl}_3$ .

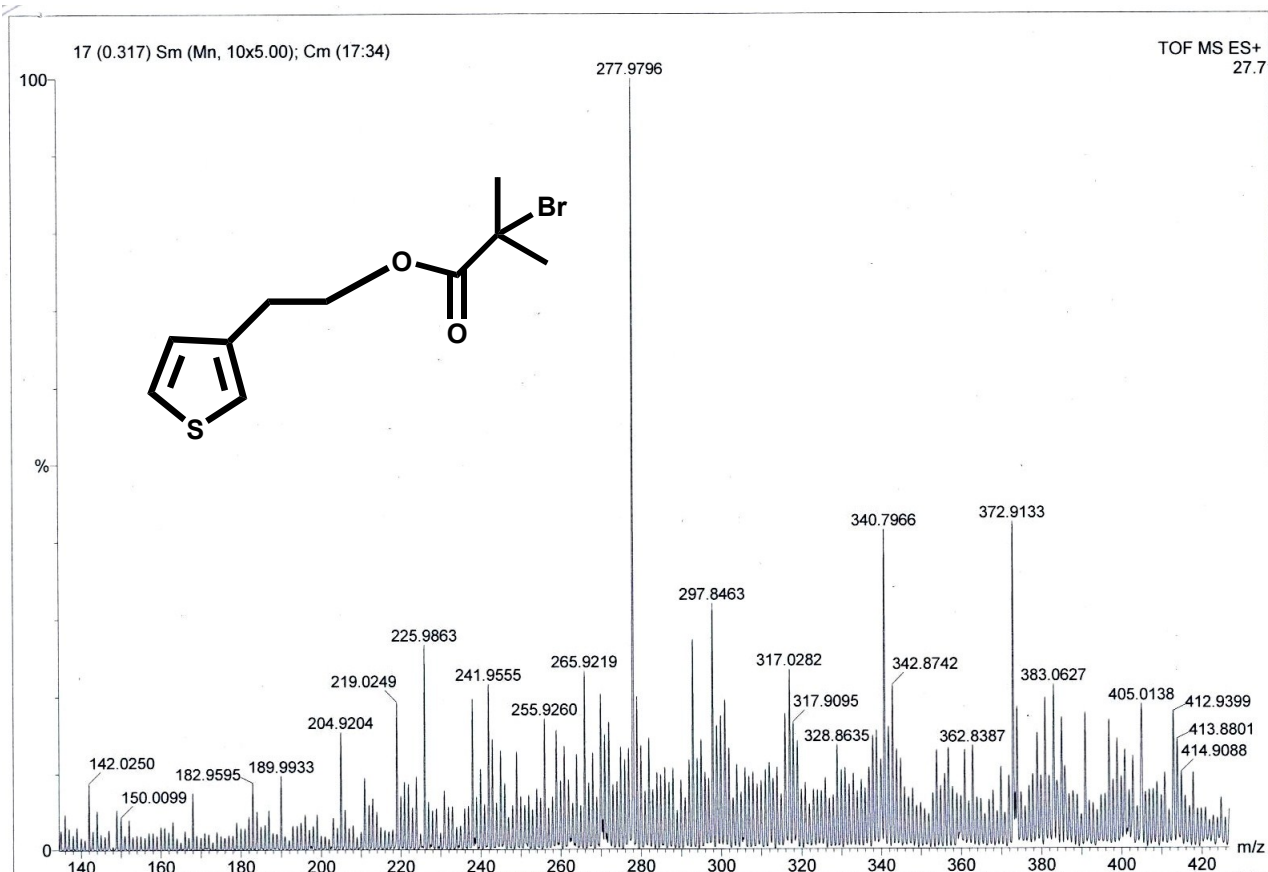

**Fig. S2** MASS spectrum of T1.

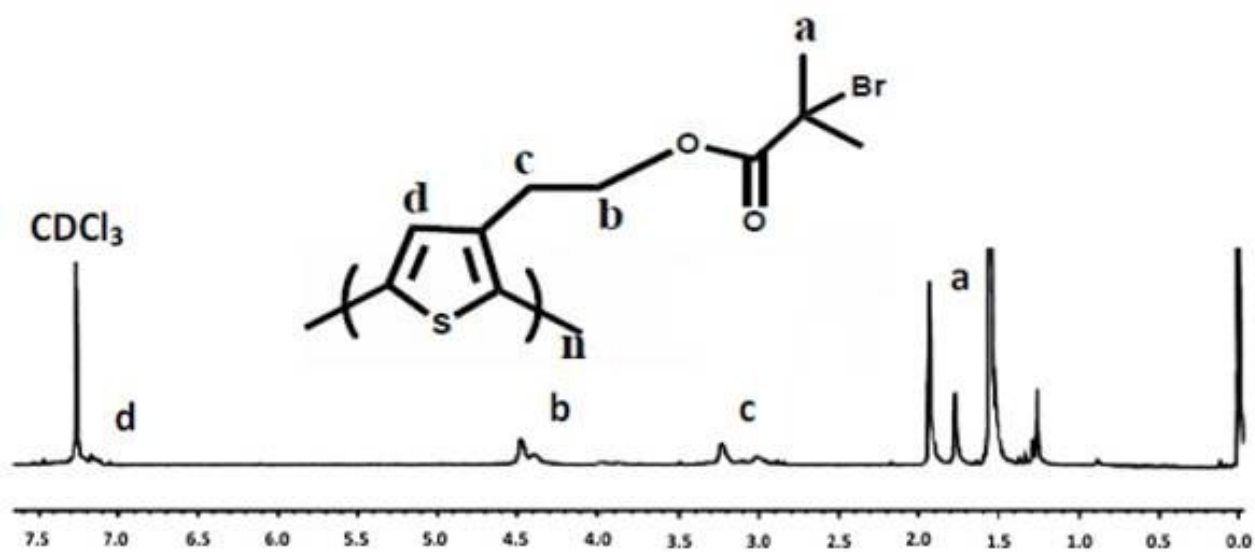

Fig. S3 <sup>1</sup>H NMR spectrum of PTI in CDCl<sub>3</sub>.

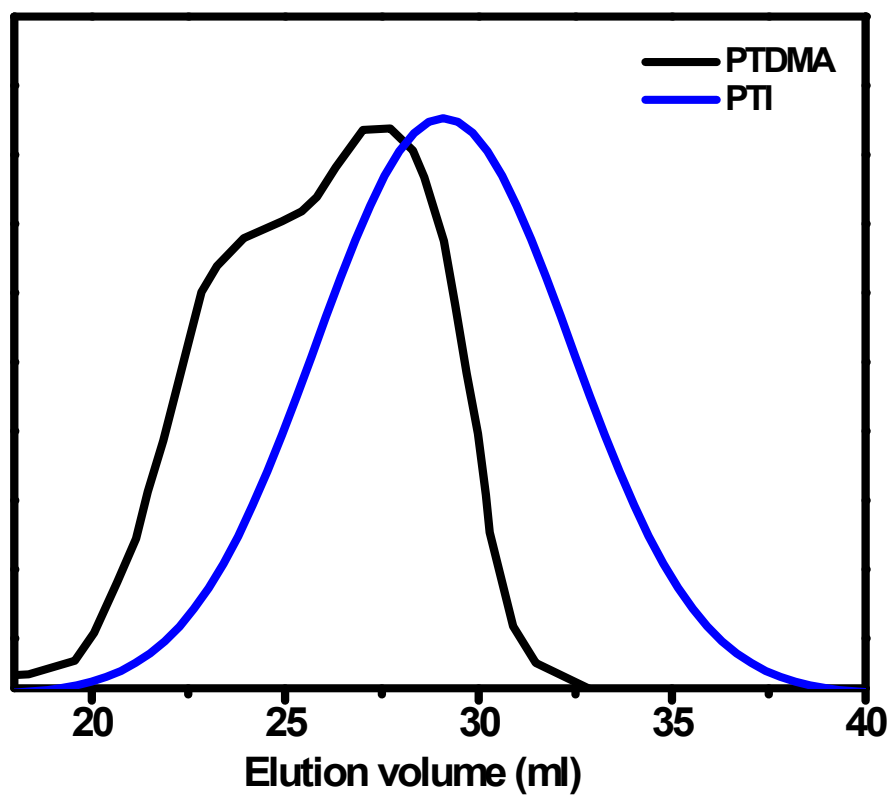

Fig. S4 GPC traces of PTI and PTDMA.

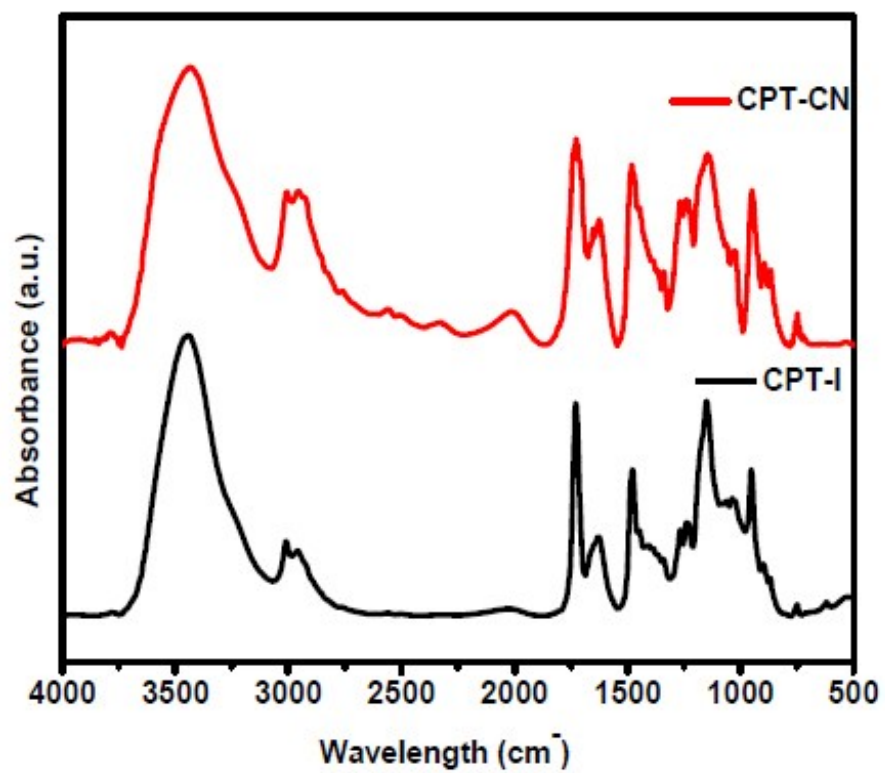

Fig. S5 FTIR spectra of CPT-I before and after addition of CN<sup>-</sup> ion.

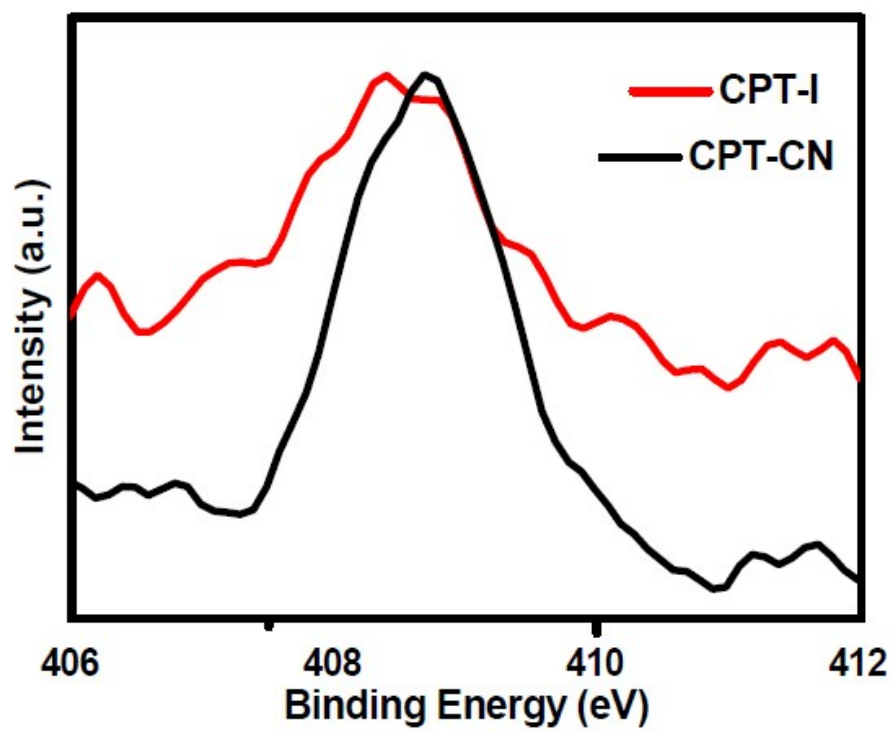

Fig. S6 XPS spectra of N 1s of CPT-I before and after addition of  $\text{CN}^-$  ion.

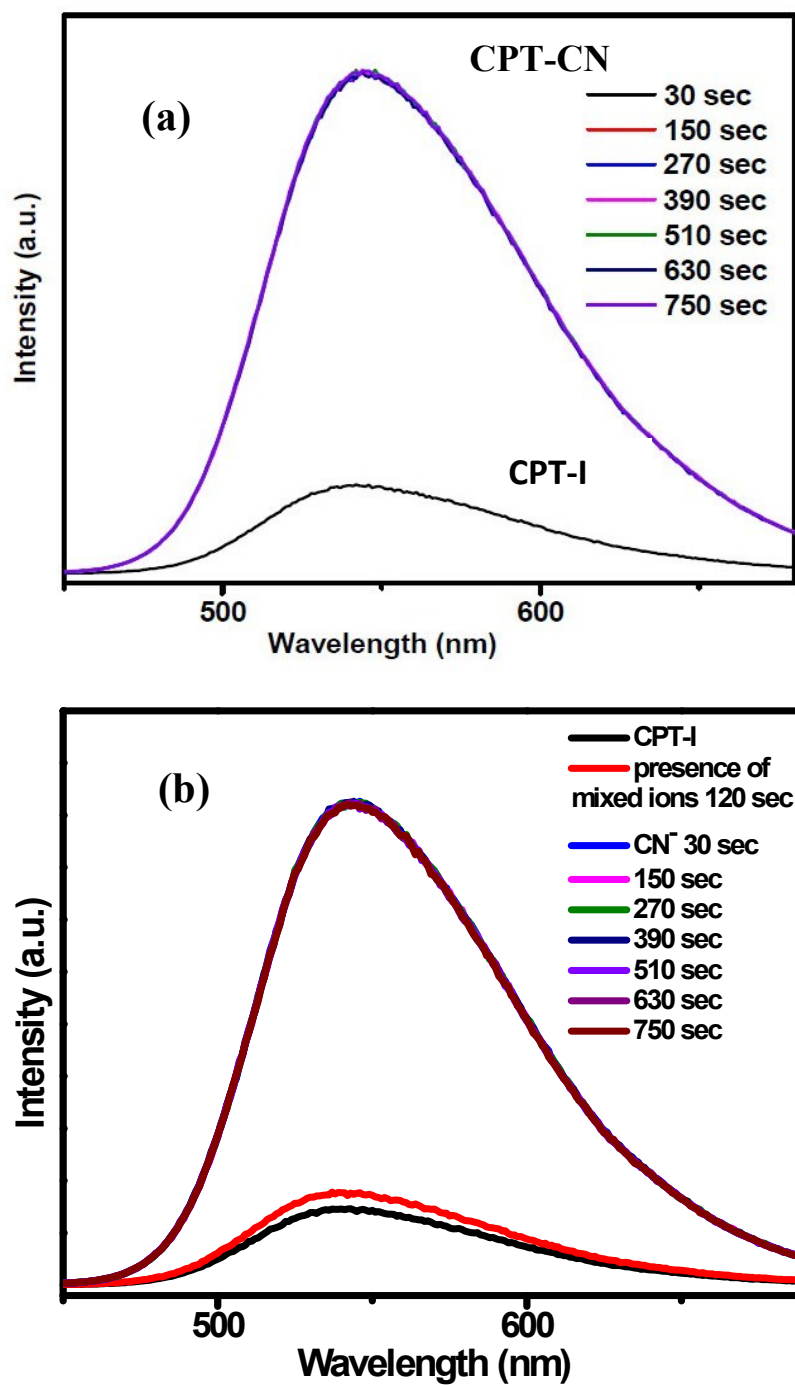

**Fig. S7 (a)** Time dependent PL intensity vs wavelength plot of CPT-I after addition of 19.6  $\mu\text{M}$   $\text{CN}^-$  ion in HPLC water without other anions and **(b)** in presence of mixed ions.



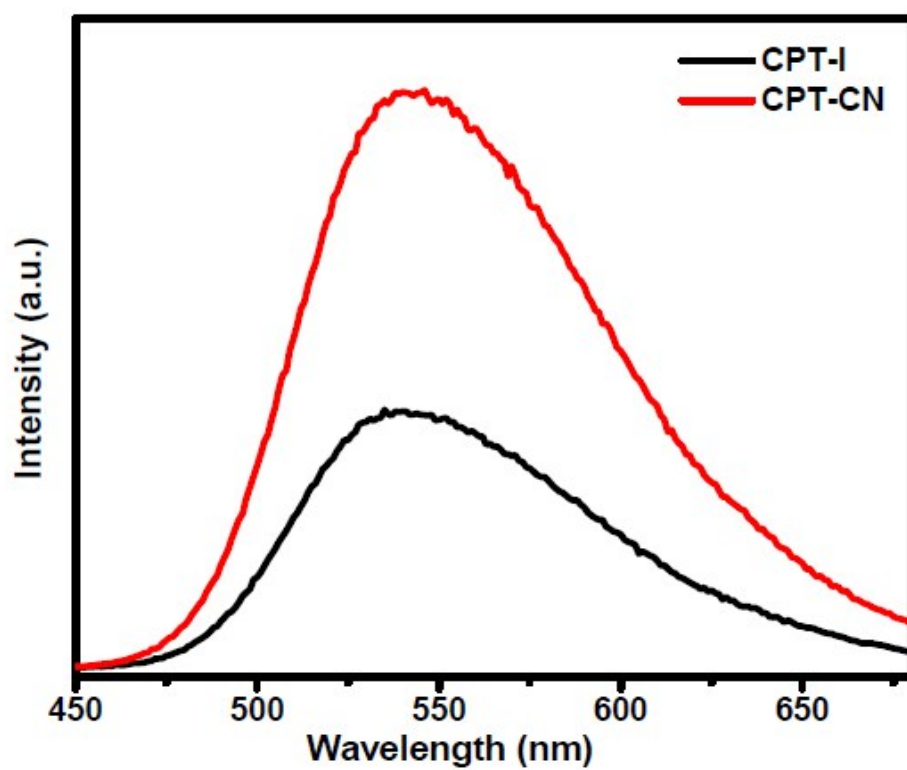

**Fig. S8** PL intensity vs wavelength plot of CPT-I before and after addition of 19.6  $\mu\text{M}$   $\text{CN}^-$  ion in pH 7.4 PBS buffer.

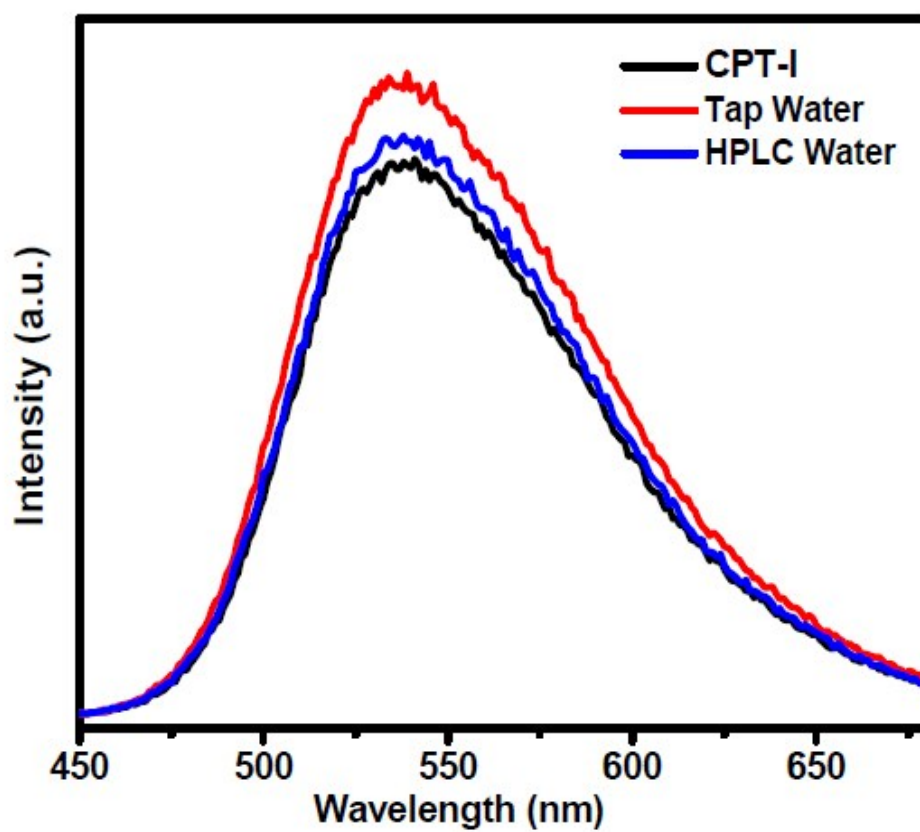

**Fig. S9** PL intensity vs wavelength plot of CPT-I in HPLC water and underground tap water.
